# Supplementary material for: Evaluating the Risk of Conflict on Recent Ebola Outbreaks in Guinea and the Democratic Republic of the Congo
Source: bioRxiv or medRxiv preprint supplement (doi:10.1101/2023.05.30.23290713), 2024-02-28
Supplement: Supplementary file [file media-4.pdf]

## Additional file 4

Proximity of battles, protests and riots to major cities in Guinea and the DRC

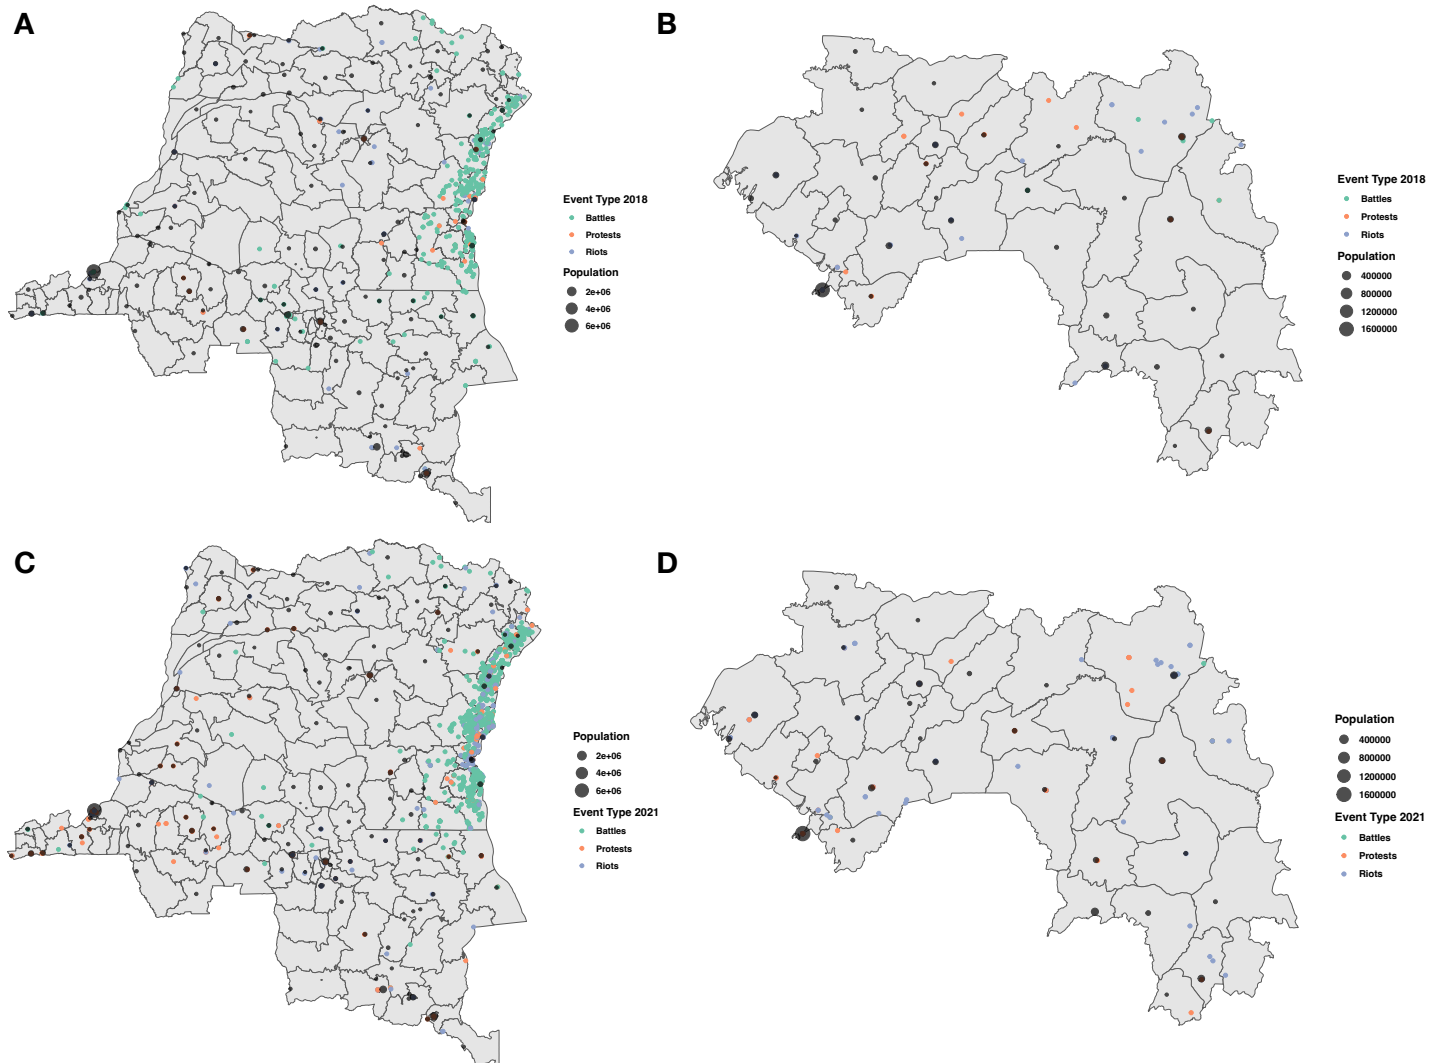

**Fig.S2** The location, by longitude and latitude, of major cities (point size = population size) and conflict event for **A**, the Democratic Republic of Congo in 2018, **B**, Guinea in 2018, **C**, the Democratic Republic of Congo in 2021 and **D**, Guinea in 2021.
